# Supplementary material for: Highly efficient generation of sheep with a defined FecBB mutation via adenine base editing
Source: PubMed Central journal article supplement (PMC7328262; doi:10.1186/s12711-020-00554-6), 2020-07-01

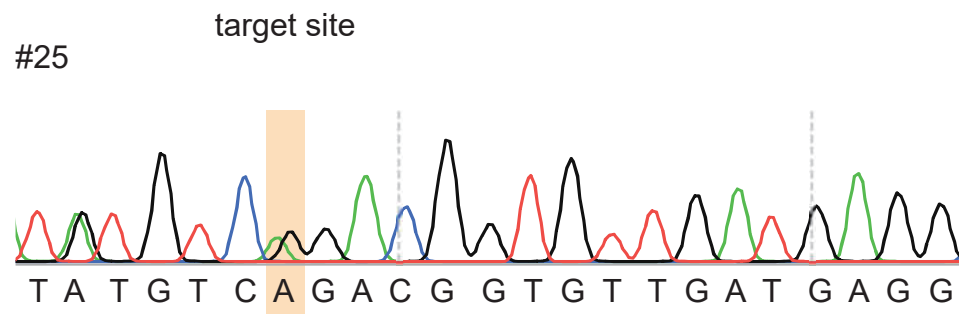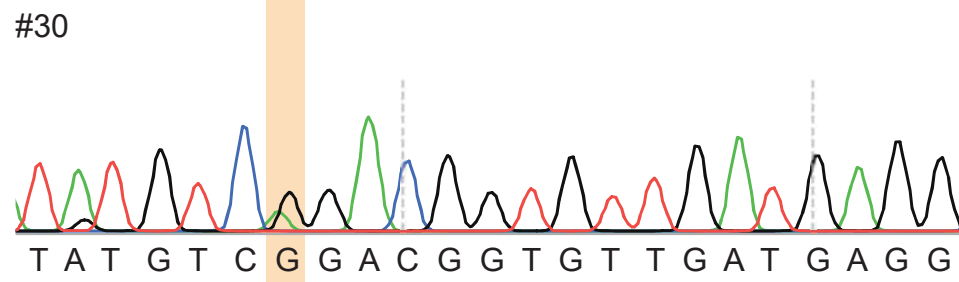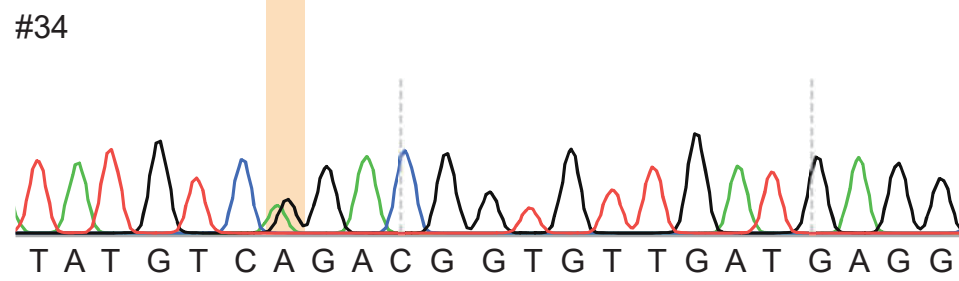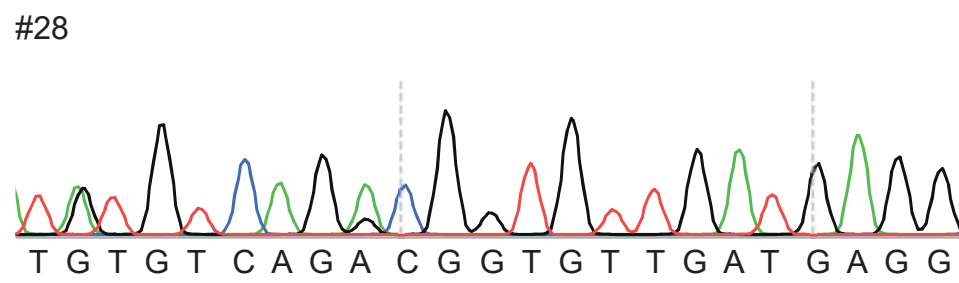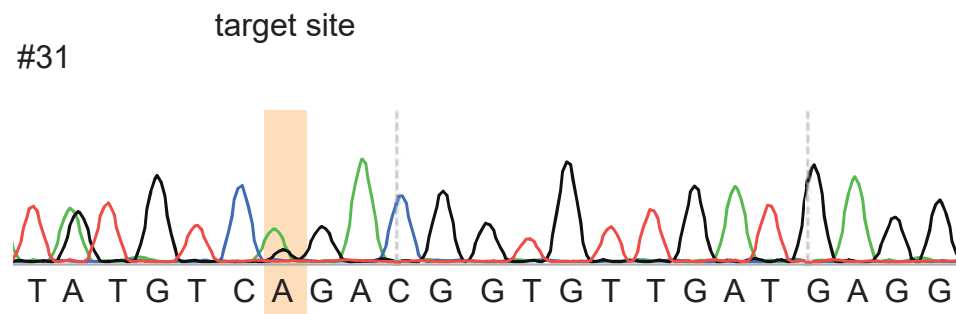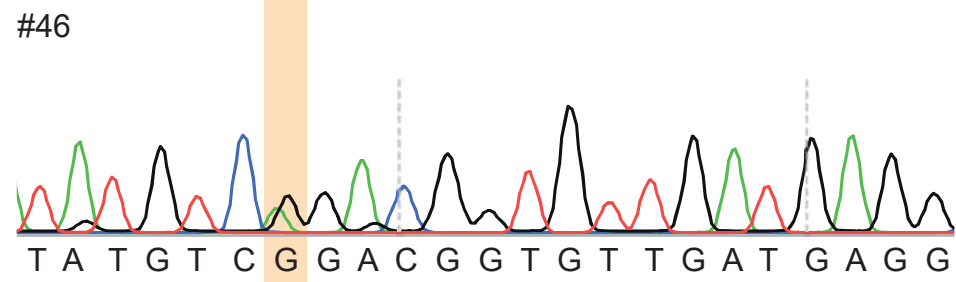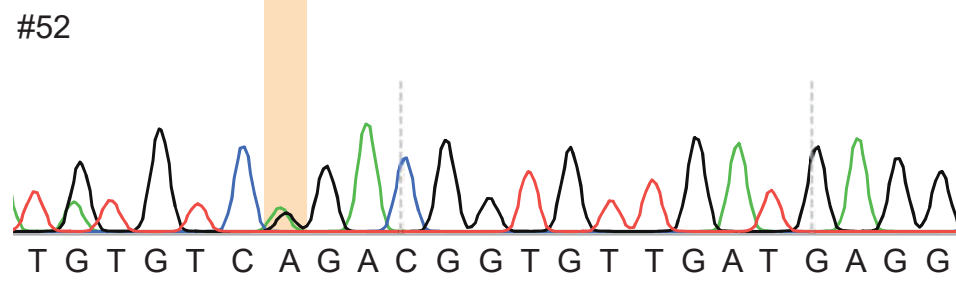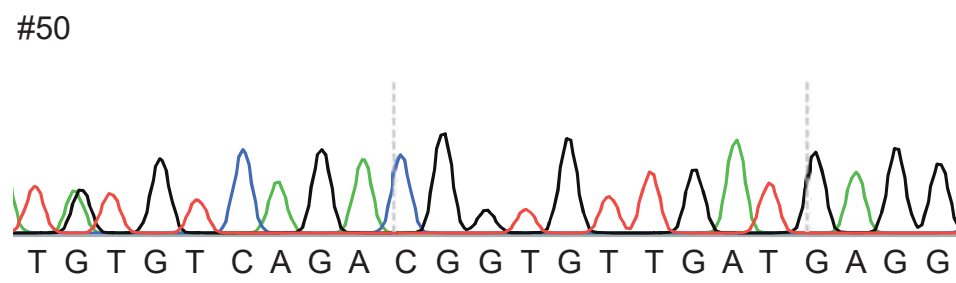

Supplement: 12711_2020_554_MOESM3_ESM.pdf [file 12711_2020_554_MOESM3_ESM.pdf]
